# Supplementary material for: Environmental and Household-Based Spatial Risks for Tungiasis in an Endemic Area of Coastal Kenya
Source: MDPI journal article supplement (doi:10.3390/tropicalmed7010002), 2021-12-23
Supplement: s1 [file s1]

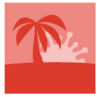

*Supplementary Materials*

# Environmental and Household-Based Spatial Risks for Tungiasis in an Endemic Area of Coastal Kenya

Ayako Hyuga <sup>1,2</sup>, Peter S. Larson <sup>3,4,5</sup>, Morris Ndemwa <sup>2,3</sup>, Sheru W. Muuo <sup>3</sup>, Mwatasa Changoma <sup>3</sup>, Mohamed Karama <sup>6</sup>, Kensuke Goto <sup>7</sup> and Satoshi Kaneko <sup>1,2,3,\*</sup>

<sup>1</sup> Graduate School of Biomedical Sciences, Nagasaki University, 1-12-4 Sakamoto, Nagasaki-shi, Nagasaki 852-8523, Japan; ayako.hyuga@gmail.com (A.H.); skaneko@nagasaki-u.ac.jp (S.K.)

<sup>2</sup> Department of Eco-Epidemiology, Institute of Tropical Medicine, Nagasaki University, 1-12-4 Sakamoto, Nagasaki-shi, Nagasaki 852-8523, Japan; morrisndmw@gmail.com

<sup>3</sup> Nagasaki University Institute of Tropical Medicine-Kenya Medical Research Institute (NUTM-KEMRI) Project, C/O Centre for Microbiology Research, KEMRI, Nairobi P.O. Box 19993-00202, Kenya; anfangen@umich.edu (P.S.L.); sheruwanyua@yahoo.com (S.W.M.); jtasa06@gmail.com (M.C.)

<sup>4</sup> Social Environment and Health, Survey Research Center, Institute for Social Research, University of Michigan, Ann Arbor, MI 48109, USA

<sup>5</sup> Department of Epidemiology, School of Public Health, University of Michigan, Ann Arbor, MI 48109, USA.

<sup>6</sup> Centre of Public Health Research, Kenya Medical Research Institute (KEMRI), Off Mbagathi Road, Nairobi P.O. Box 54840 00200, Kenya; mkarama@umma.ac.ke

<sup>7</sup> Division of Health and Safety Sciences Education, Department of Educational Collaboration, Osaka Kyoiku University, 4-698-1 Asahigaoka, Kashiwara-shi, Osaka 582-8582, Japan; goto@cc.osaka-kyoiku.ac.jp

\* Correspondence: skaneko@nagasaki-u.ac.jp

**Table S1.** Ecological data used in the analysis and its sources and details.

| Variable                                   | Data source                                                          | Resolution           | Year/Version              | Data identifier                                                                                                      | URL                                                                                                                                                                                                                           |
|--------------------------------------------|----------------------------------------------------------------------|----------------------|---------------------------|----------------------------------------------------------------------------------------------------------------------|-------------------------------------------------------------------------------------------------------------------------------------------------------------------------------------------------------------------------------|
| NDVI                                       | NASA LP DAAC                                                         | 250 m                | 2011                      | MOD13Q1                                                                                                              | <a href="https://earthengine.google.com/">https://earthengine.google.com/</a>                                                                                                                                                 |
| Land cover                                 | NASA LP DAAC                                                         | 500 m                | 2011                      | MCD12Q1                                                                                                              | <a href="https://earthengine.google.com/">https://earthengine.google.com/</a>                                                                                                                                                 |
| TWI                                        | created by the authors using ASTER GDEM<br>METI/NASA<br>(ASTER GDEM) | 30 m<br>(ASTER GDEM) | Version 3<br>(ASTER GDEM) | ASTGTM v003<br>(ASTER GDEM)                                                                                          | <a href="https://search.earthdata.nasa.gov/search">https://search.earthdata.nasa.gov/search</a>                                                                                                                               |
| Elevation                                  | JAXA                                                                 | 30 m                 | Version 3.1               | AW3D30                                                                                                               | <a href="https://www.eorc.jaxa.jp/ALOS/en/aw3d30/index.htm">https://www.eorc.jaxa.jp/ALOS/en/aw3d30/index.htm</a>                                                                                                             |
| Soil pH                                    | ISRIC                                                                | 250 m                |                           | SoilGrids250m 2017-03<br>- Soil pH in H2O<br>4c59ee58-a24e-4154-912e-0ff18395ac0d                                    | <a href="https://data.isric.org/geonetwork/srv/eng/catalog.search#/metadata/4c59ee58-a24e-4154-912e-0ff18395ac0d">https://data.isric.org/geonetwork/srv/eng/catalog.search#/metadata/4c59ee58-a24e-4154-912e-0ff18395ac0d</a> |
| Soil texture                               | ISRIC                                                                | 250 m                |                           | SoilGrids250m 2017-03<br>- Texture class (USDA system)<br>f9a3a4e0-27a8-4acc-861f-26c112699c3e                       | <a href="https://data.isric.org/geonetwork/srv/eng/catalog.search#/metadata/f9a3a4e0-27a8-4acc-861f-26c112699c3e">https://data.isric.org/geonetwork/srv/eng/catalog.search#/metadata/f9a3a4e0-27a8-4acc-861f-26c112699c3e</a> |
| Soil organic carbon content                | ISRIC                                                                | 250 m                |                           | SoilGrids250m 2017-03<br>- Soil organic carbon content (fine earth fraction)<br>076db4e8-11a9-4262-b6aa-cfa703a3c0af | <a href="https://data.isric.org/geonetwork/srv/eng/catalog.search#/metadata/076db4e8-11a9-4262-b6aa-cfa703a3c0af">https://data.isric.org/geonetwork/srv/eng/catalog.search#/metadata/076db4e8-11a9-4262-b6aa-cfa703a3c0af</a> |
| Aluminium content in the soil              | ISRIC                                                                | 250m                 |                           | Africa SoilGrids nutrients<br>- Extractable Aluminium (Al)<br>a36f7919-0d6e-4044-902c-64a74feade6b                   | <a href="https://data.isric.org/geonetwork/srv/eng/catalog.search#/metadata/a36f7919-0d6e-4044-902c-64a74feade6b">https://data.isric.org/geonetwork/srv/eng/catalog.search#/metadata/a36f7919-0d6e-4044-902c-64a74feade6b</a> |
| Iron content in the soil                   | ISRIC                                                                | 250 m                |                           | Africa SoilGrids nutrients<br>- Extractable Iron (Fe)<br>5cd5336c-2f45-4430-a9a8-312aa2095cb6                        | <a href="https://data.isric.org/geonetwork/srv/eng/catalog.search#/metadata/5cd5336c-2f45-4430-a9a8-312aa2095cb6">https://data.isric.org/geonetwork/srv/eng/catalog.search#/metadata/5cd5336c-2f45-4430-a9a8-312aa2095cb6</a> |
| Distance to the nearest animal consevation | created by the authors                                               |                      |                           |                                                                                                                      |                                                                                                                                                                                                                               |

## Distribution of environmental suitability for tungiasis [6]

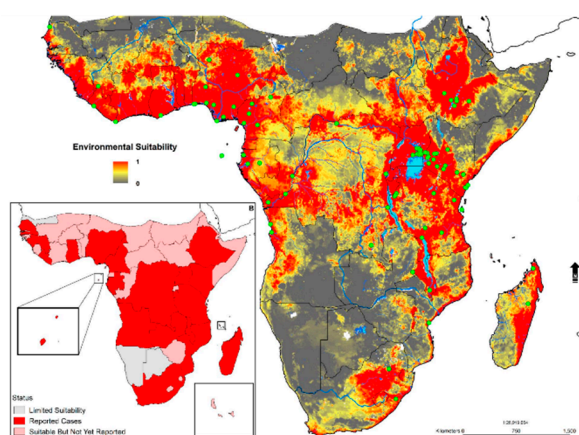

## Distribution of laterite [72]

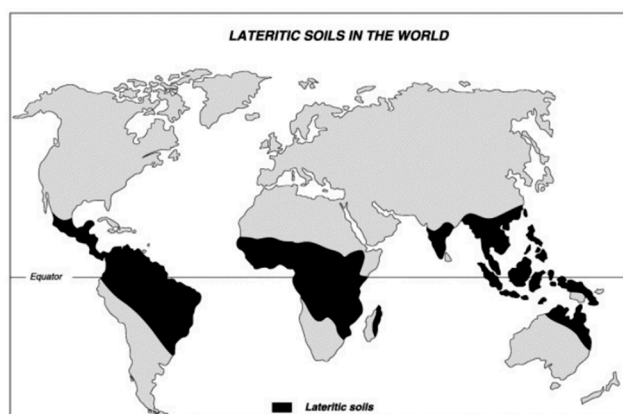

## Distribution of aluminum content in soil [30, 32]

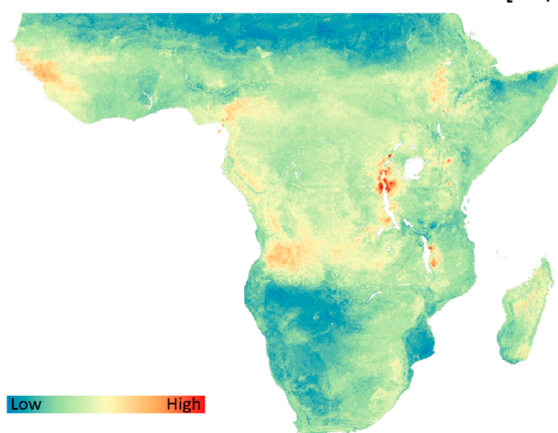

## Distribution of iron content in soil [30, 32]

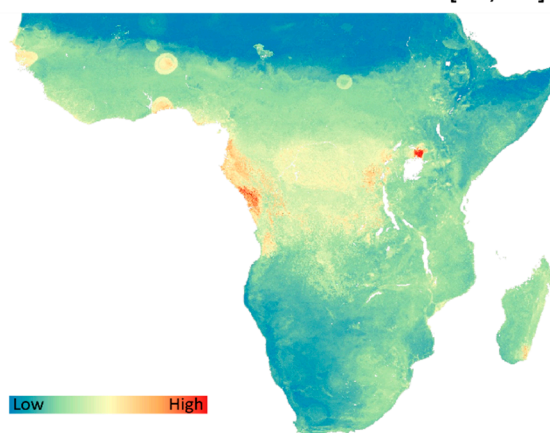

**Figure S1.** Distribution of environmental suitability for tungiasis, laterite, aluminum content in soil, and iron content in soil in the African continent.

## References

6. Deka, M.A. Mapping the Geographic Distribution of Tungiasis in Sub-Saharan Africa. *Trop. Med. Infect. Dis.* 2020, 5, 122, <https://doi.org/10.3390/tropicalmed5030122>.
30. ISRIC Data Hub. Available online: <https://data.isric.org/geonetwork/srv/eng/catalog.search#/home> (accessed on 20 March 2021).
32. Hengl, T.; Leenaars, J.G.B.; Shepherd, K.D.; Walsh, M.G.; Heuvelink, G.B.M.; Mamo, T.; Tiliahun, H.; Berkhout, E.; Cooper, M.; Fegraus, E.; et al. Soil nutrient maps of Sub-Saharan Africa: Assessment of soil nutrient content at 250 m spatial resolution using machine learning. *Nutr. Cycl. Agroecosyst.* 2017, 109, 77–102, <https://doi.org/10.1007/s10705-017-9870-x>.
72. Reproduced from Daniel Nahon. *Altérations dans la zone tropicale. Signification à travers les mécanismes anciens et/ou encore actuels.* *Comptes Rendus Geoscience* 2003;335(16):1109–1119. Copyright © 2003 Académie des sciences, published by Elsevier Masson SAS. All rights reserved.
